# Supplementary material
Source: publisher figshare collection journal article supplement (https://frontiersin.figshare.com/ndownloader/files/25723958)
Supplement: Supplementary file [file 25723958]

**Supplementary Table 1: Student Learning Objectives and corresponding Bloom's Level suggestions**

| <b>Student Learning Objectives</b> |                                                                                                                   | <b>Suggested Bloom's Level</b> |
|------------------------------------|-------------------------------------------------------------------------------------------------------------------|--------------------------------|
| <b>Conceptual Knowledge</b>        |                                                                                                                   |                                |
| 1.                                 | Estimate and evaluate the bacterial load of collected environmental samples                                       | Evaluation                     |
| 2.                                 | Compare and contrast morphological and molecular identification methods of bacterial species                      | Evaluation                     |
| 3.                                 | Identify and analyze diversity of bacterial species in different environmental samples by analyzing DNA sequences | Comprehension                  |
| <b>Laboratory Skills</b>           |                                                                                                                   |                                |
| 1.                                 | Plan and collect environmental samples                                                                            | Application and Synthesis      |
| 2.                                 | Perform serial dilution                                                                                           | Comprehension and Synthesis    |
| 3.                                 | Plate and streak bacterial samples                                                                                | Comprehension and Synthesis    |
| 4.                                 | Setting up Polymerase Chain Reaction using individual bacterial colonies                                          | Comprehension and Synthesis    |
| 5.                                 | Setting up restriction endonuclease digestion reactions                                                           | Comprehension and Synthesis    |
| 6.                                 | Preparing polyacrylamide gels (Explain the chemistry of acrylamide:bis-acrylamide polymerization)                 | Comprehension and Synthesis    |
| 7.                                 | Perform gel electrophoresis to separate DNA fragments                                                             | Comprehension and Synthesis    |

|     |                                                                             |                             |
|-----|-----------------------------------------------------------------------------|-----------------------------|
| 8.  | Image DNA gels and visualize DNA fragments                                  | Comprehension and Synthesis |
| 9.  | Search and obtain 16S rRNA gene sequences using ENSEMBL                     | Comprehension and Synthesis |
| 10. | Perform in-silico digestion of 16S rRNA sequences using NEBCutter/WebCutter | Comprehension and Synthesis |
| 11. | Setting up Polymerase Chain Reaction using individual bacterial colonies    | Comprehension and Synthesis |
